# Supplementary material
Source: MDPI journal article supplement (https://www.mdpi.com/2311-5637/10/5/233)
Supplement: s1 [file s1]

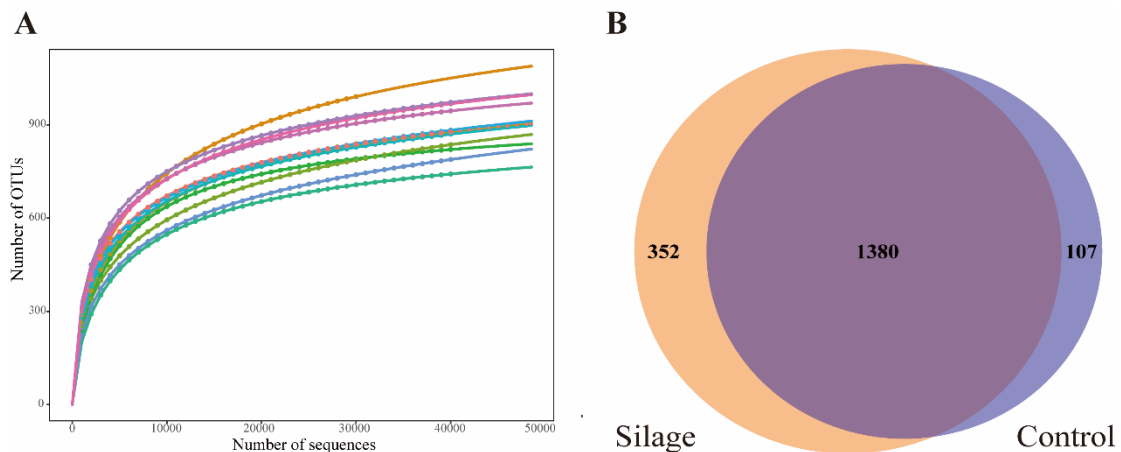

**Supplementary Figure S1.** Ruminal microbial OTUs with the different dietary groups. A) OTU-based microbial sparsity profiles were used to assess the depth of coverage for each sample. B) Venn diagram of fecal bacterial OTUs.

Note: Control, Control group; Silage, silage group; Control: Based on peanut seedling, corn husk and sorghum shell for roughage in the diet; Silage: Based on the mixed silage for roughage in the diet.

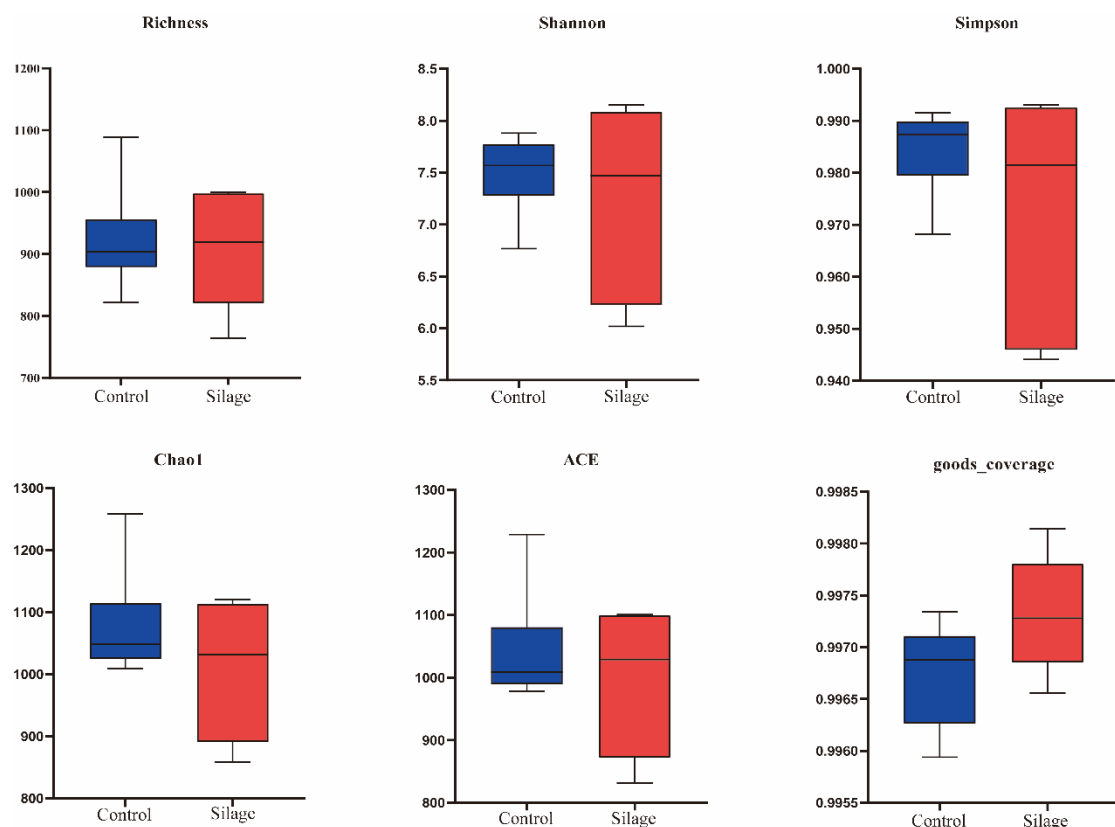

**Supplementary Figure S2.** Number of species, richness and diversity indices observed in fecal samples.

Note: Control, Control group; Silage, silage group; Control: Based on peanut seedling, corn husk and sorghum shell for roughage in the diet; Silage: Based on the mixed silage for roughage in the diet.

A Pearson Correlation of QC samples

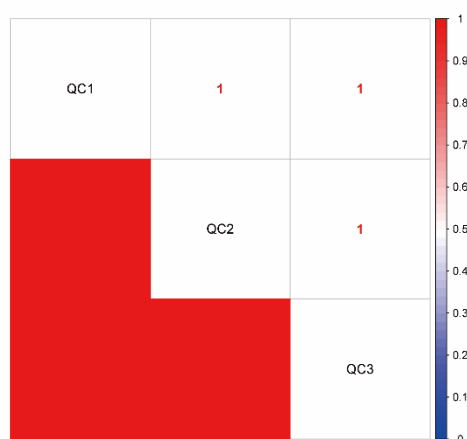

B Pearson Correlation of QC samples

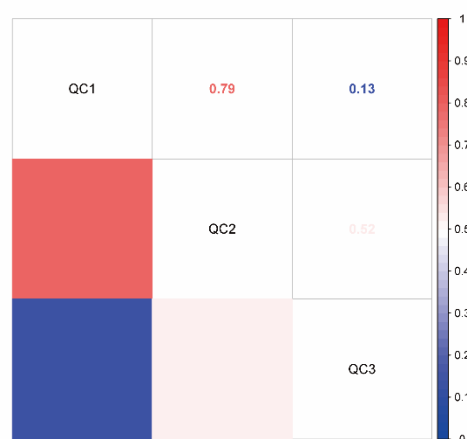

**Supplementary Figure S3.** Person Correlation of QC samples. (A: ESI+; B: ESI-)
